# Supplementary material
Source: MDPI journal article supplement (https://www.mdpi.com/2075-4701/13/9/1622)
Supplement: s1 [file s1]

# First-Principles Computation of Microscopic Mechanical Properties and Atomic Migration Behavior for Al4Si Aluminum Alloy

Jingtao Huang <sup>1,†</sup>, Jingteng Xue <sup>1,†</sup>, Mingwei Li <sup>2</sup>, Yuan Cheng <sup>3</sup>, Zhonghong Lai <sup>4</sup>, Jin Hu <sup>1</sup>, Fei Zhou <sup>5</sup>, Nan Qu <sup>1,\*</sup>, Yong Liu <sup>1,2,\*</sup> and Jingchuan Zhu <sup>1,\*</sup>

<sup>1</sup> School of Materials Science and Engineering, Harbin Institute of Technology, Harbin 150001, China; 20b909032@stu.hit.edu.cn (J.H.); xuejingteng@stu.hit.edu.cn (J.X.); hujin@hit.edu.cn (J.H.)

<sup>2</sup> National Key Laboratory for Precision Hot Processing of Metals, Harbin Institute of Technology, Harbin 150001, China; limingwei@hit.edu.cn

<sup>3</sup> National Key Laboratory of Science and Technology on Advanced Composites in Special Environments, Harbin Institute of Technology, Harbin 150001, China; cy6810@hit.edu.cn

<sup>4</sup> Center for Analysis, Measurement and Computing, Harbin Institute of Technology, Harbin 150001, China; zhhlai@hit.edu.cn

<sup>5</sup> State Key Laboratory for Environment-Friendly Energy Materials, School of Materials Science and Engineering, Southwest University of Science and Technology, Mianyang 621010, China; feizhou@swust.edu.cn

\* Correspondence: 18b909065@stu.hit.edu.cn (N.Q.); lyonghit@hit.edu.cn (Y.L.); fgms@hit.edu.cn (J.Z.); Tel.: +86-0451-86413792 (J.Z.)

† These authors contributed equally to this work.

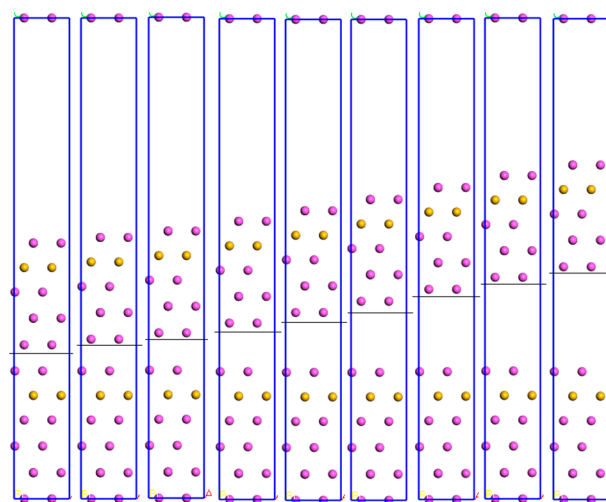

**Figure S1.** Schematic diagram of the Al4Si tensile fracture process.

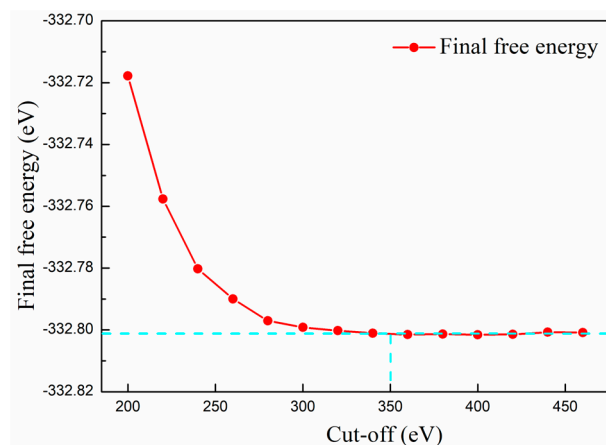

**Figure S2.** Cutoff energy convergence test result curve.

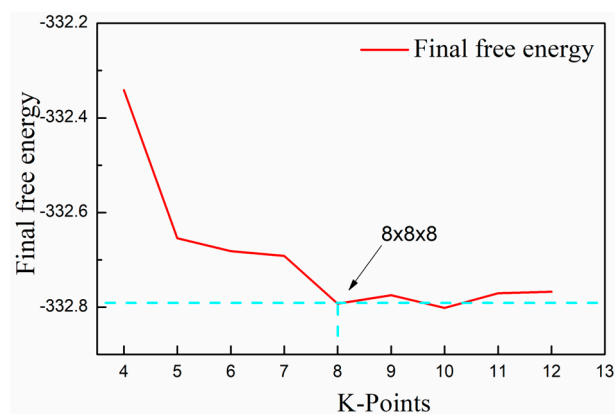

**Figure S3.** K-points energy convergence test result curve.

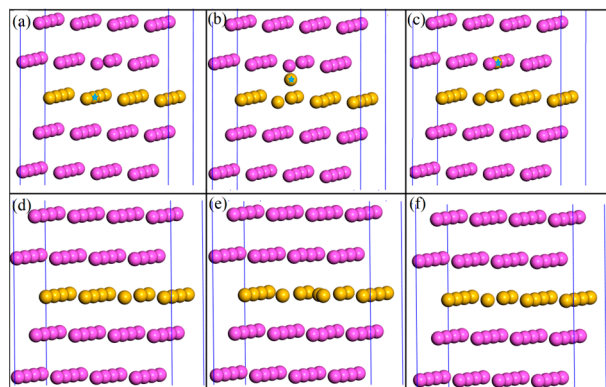

**Figure S4.** Schematic diagram of diffusive transport pathways.
